# Supplementary material for: Efficacy and HIV drug resistance profile of second-line ART among patients having received long-term first-line regimens in rural China
Source: PubMed Central journal article supplement (PMC4597210; doi:10.1038/srep14823), 2015-10-08
Supplement: srep14823-s1.pdf [file srep14823-s1.pdf]

**Efficacy and HIV drug resistance profile of second-line ART among patients receiving long-term first-line regimens in rural China**

Jing Wang<sup>1,2#</sup>, Zhe Wang<sup>3#</sup>, Jia Liu<sup>3#</sup>, Yanchao Yue<sup>4</sup>, Shimei Yang<sup>5</sup>, Huimin Huang<sup>6</sup>, Cui He<sup>1</sup>, Lingjie Liao<sup>1</sup>, Hui Xing<sup>1\*</sup>, Yuhua Ruan<sup>1</sup>, Yiming Shao<sup>1\*</sup>

**Supplementary Table S1. Prevalence of HIV drug resistance mutations before and at 6 and 12 months after switching drugs**

|         | Before regimen switch | 6 month after regimen switch | 12 month after regimen switch |
|---------|-----------------------|------------------------------|-------------------------------|
|         | N=90 (%)              | N=81 (%)                     | N=82 (%)                      |
| NNRTIs  | 59(65.5)              | 20(24.7)                     | 22(26.8)                      |
| K101EN  | 4(4.4)                | 1(1.2)                       | 0                             |
| K103NS  | 35(38.9)              | 13(16.0)                     | 16(19.5)                      |
| Y181CY  | 20(22.2)              | 11(13.6)                     | 10(12.2)                      |
| Y188LFY | 6(6.7)                | 2(2.5)                       | 1(1.2)                        |
| G190A   | 13(14.4)              | 1(1.2)                       | 2(2.4)                        |
| NRTIs   | 48(53.3)              | 16(19.7)                     | 15(18.3)                      |
| M41L    | 19(21.1)              | 6(7.4)                       | 8(9.7)                        |
| K65R    | 1(1.1)                | 0                            | 0                             |
| L74V    | 1(1.1)                | 1(1.2)                       | 1(1.2)                        |
| D67NTG  | 18(20.0)              | 6(7.4)                       | 7(8.5)                        |
| K70R    | 14(15.5)              | 6(7.4)                       | 6(7.3)                        |
| T69NDAT | 8(8.9)                | 3(3.7)                       | 4(4.9)                        |
| M184VI  | 44(48.9)              | 13(16.0)                     | 13(15.8)                      |
| T215YSF | 31(34.4)              | 12(14.8)                     | 10(12.2)                      |
| L210W   | 8(8.9)                | 3(3.7)                       | 3(3.6)                        |
| PIs     | 1(1.1)                | 0                            | 0                             |
| I47V    | 1(1.1)                | 0                            | 0                             |
